# Supplementary material for: Three-dimensional tissue-engineered human skeletal muscle model of Pompe disease
Source: PubMed Central journal article supplement (PMC8100136; doi:10.1038/s42003-021-02059-4), 2021-05-05
Supplement: 42003_2021_2059_MOESM1_ESM.pdf [file 42003_2021_2059_MOESM1_ESM.pdf]

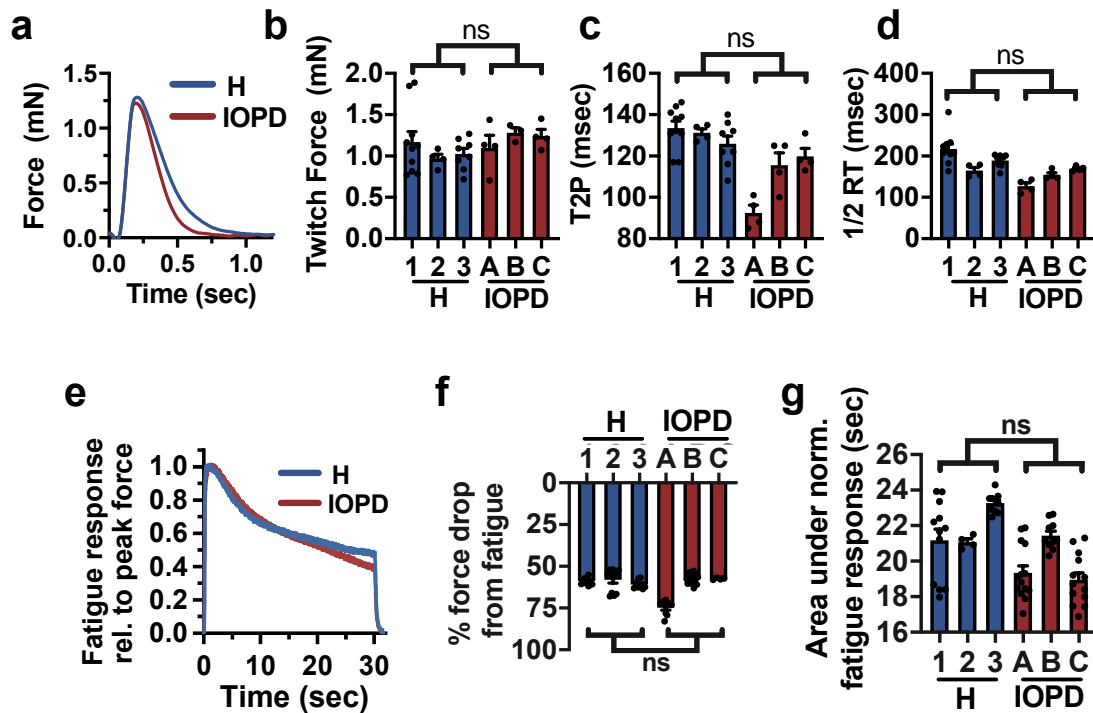

1  
2  
3  
4  
5  
6  
7  
8  
9  
10  
11

**Supplementary Figure 1. Twitch and fatigue force response in healthy and IOPD myobundles.** **a-d**, Representative twitch force trace from healthy (blue) and IOPD (red) myobundles (**a**) and quantified twitch force (**b**), time to peak tension (T2P, **c**), and half-relaxation time (1/2 RT, **d**) (n=4–10 myobundles per donor) from 3 healthy (1, 2, 3) and 3 IOPD (A, B, C) donors. **e**, Representative force traces during fatigue test (20 Hz stimulation for 30 sec) normalized to value of peak force. **f,g**, Quantified (**f**) percent force decline at the end of fatigue stimulation (n=4–20 myobundles per donor), and (**g**) area under normalized force curve during fatigue stimulation (n=4–14 myobundles per donor). Data: mean ± SEM. ns, not significant.

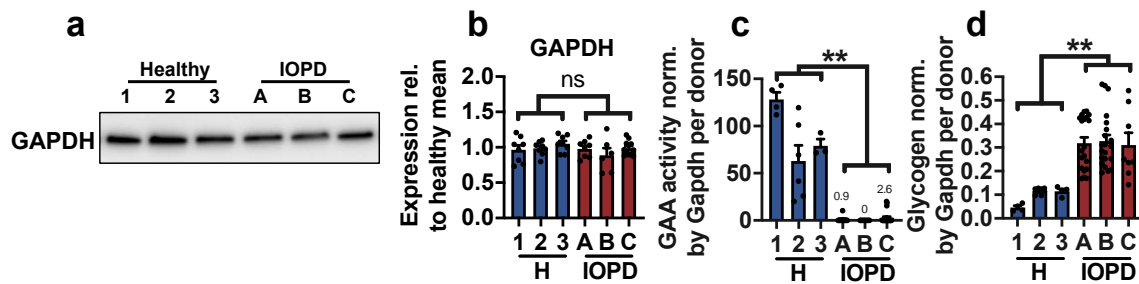

12  
13  
14  
15  
16  
17  
18  
19  
20  
21

**Supplementary Figure 2. GAA activity and glycogen content in healthy and IOPD myobundles normalized by GAPDH.** **a-b**, Representative Western blots (**a**) and quantified protein expression (**b**) of GAPDH (n=6–12 myobundles per donor) from 3 healthy (1, 2, 3) and 3 IOPD (A, B, C) donors. **c-d**, GAA activity (**c**) and glycogen content (**d**) in 3 healthy (1, 2, 3) and 3 IOPD (A, B, C) donors (n=4–21 myobundles per donor) normalized by mean GAPDH expression per donor. Data: mean ± SEM. \*\*p < 0.01; ns, not significant.

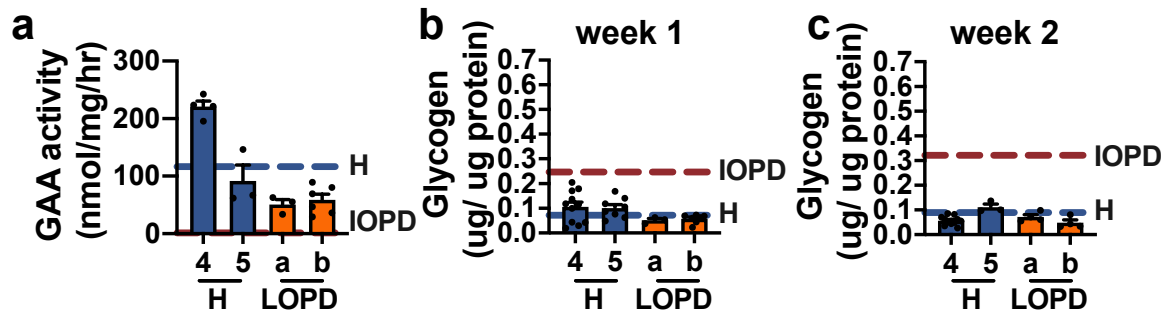

22  
23  
24  
25  
26  
27  
28  
29  
30  
31

**Supplementary Figure 3. GAA activity and glycogen content in late-onset Pompe disease (LOPD) myobundles.** **a**, GAA activity in 2-week differentiated myobundles engineered from two additional healthy donors, 4 and 5, and two donors with LOPD, a and b (n=3–6 myobundles per donor). **b-c**, Glycogen content in myobundles from healthy donors 4 and 5 and from LOPD donors a and b after one week (**b**) and two weeks (**c**) of 3D differentiation (n=3–11 myobundles per donor). Dashed H-line denotes the mean value across all five healthy donors, 1-5, and dashed IOPD-line denotes the mean value across all three untreated IOPD donors, A-C.

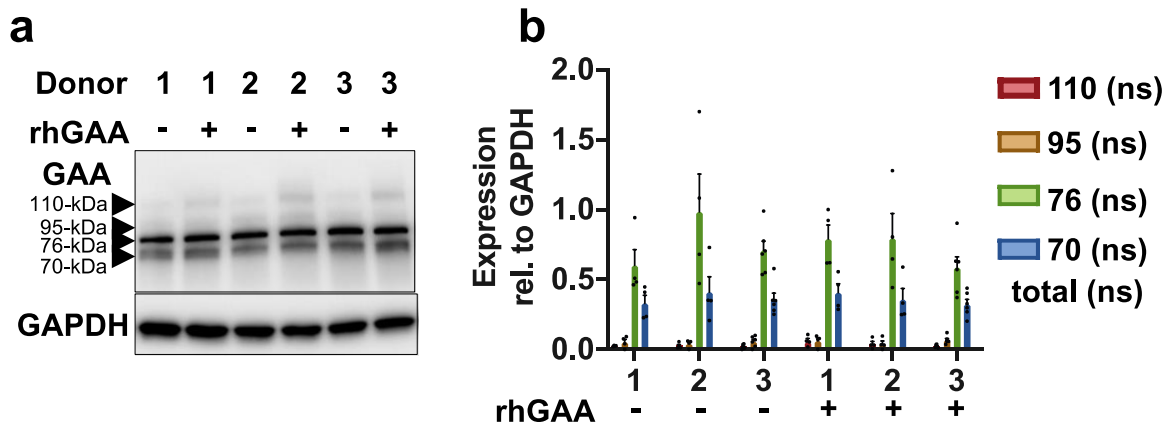

32  
33  
34  
35  
36  
37  
38  
39

**Supplementary Figure 4. rhGAA treatment of healthy myobundles.** **a**, Representative Western blot of GAA isoforms in rhGAA treated (+) and untreated (-) myobundles from 3 healthy donors (1, 2, 3) and quantification of isoform expression relative to GAPDH (**b**, n=4–6 myobundles per donor). Data: mean  $\pm$  SEM. ns, not significant between + and – group across the donors.

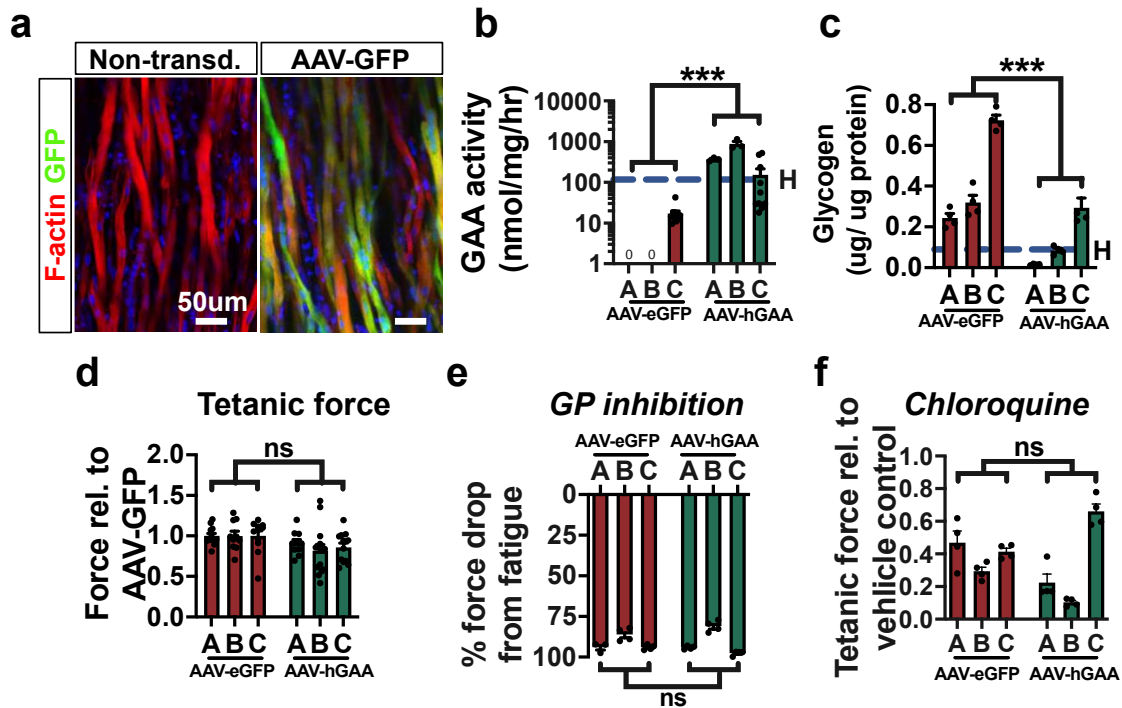

40  
 41 **Supplementary Figure 5. hGAA gene therapy in IOPD myobundles.** **a**, Representative  
 42 images of rAAV9-MHCK7eGFP (AAV-GFP) vector-transduced and non-transduced IOPD  
 43 myobundles differentiated for 2 weeks and stained with GFP antibody. **b-c**, Quantified GAA  
 44 activity (**b**,  $n=3-10$  myobundles per group) and glycogen content (**c**,  $n=4$  myobundles per  
 45 group) in 2-week-differentiated IOPD myobundles transduced with AAV-GFP or rAAV9-  
 46 MHCK7hGAA (AAV-hGAA) vectors from 3 IOPD donors (A, B, C). Dashed H-line denotes  
 47 mean value across all five healthy donors. **d**, Tetanic force of IO myobundles after AAV-hGAA  
 48 vector treatment shown relative to AAV-GFP vector treatment ( $n=10-14$  myobundles per  
 49 group). **e**, Percent force decline at the end of fatigue stimulation in response to 24 h of GPi  
 50 exposure in AAV-GFP or AAV-hGAA vector treated IOPD myobundles ( $n=3-4$  myobundles  
 51 per group). **f**, Tetanic force in response to 24 h of chloroquine exposure in AAV-GFP or AAV-  
 52 hGAA vector treated IOPD myobundles ( $n=4$  myobundles per group). Data: mean  $\pm$  SEM.  
 53 \*\*\* $p < 0.001$ ; ns, not significant.

54

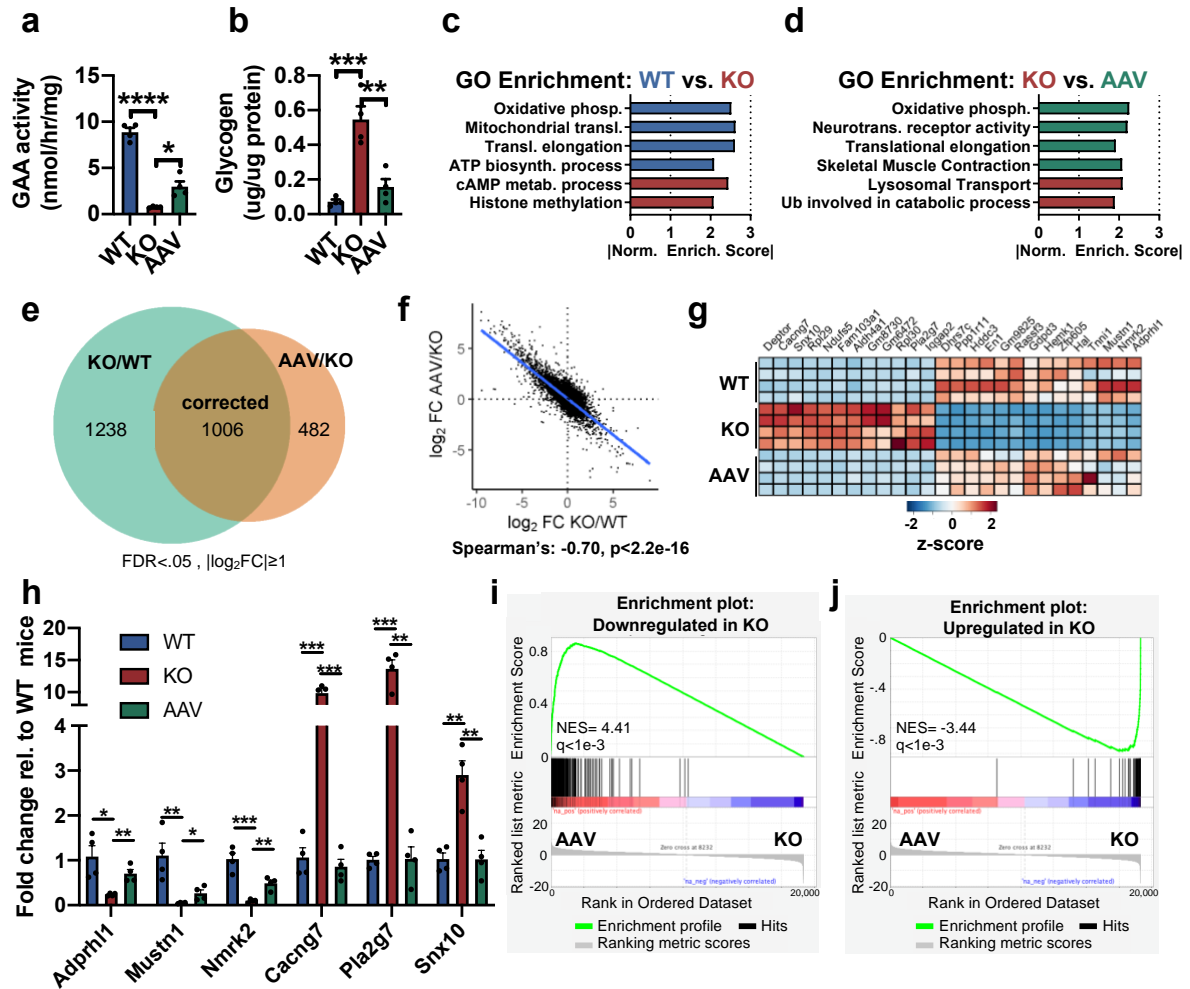

55  
56  
57  
58  
59  
60  
61  
62  
63  
64  
65  
66  
67  
68  
69  
70  
71  
72  
73  
74

**Supp. Fig. 6. Transcriptomic changes in mice as a result of GAA knockout and hGAA gene therapy.** **a,b**, GAA activity (**a**) and glycogen content (**b**) measured in quadriceps of wild-type (WT) mice, GAA<sup>-/-</sup> (KO) mice, and liver-specific AAV2/8-LSPhGAAPa (AAV) vector-treated KO mice (n=4 mice per group). **c**, GSEA on RNA-seq data to identify GO terms enriched in WT (blue) or KO (red) mice plotted against normalized enrichment score (NES) (FDR<0.15). **d**, GSEA on RNA-seq data to identify GO terms enriched in KO (red) or AAV vector-treated (green) mice (FDR<0.15). **e**, Venn diagram with differentially expressed genes ( $p_{adj}<.05$ ,  $|\log_2FC|\geq 1$ ) in two comparisons (1: KO vs. WT mice; 2: AAV vector-treated vs. untreated KO mice), with the intersection indicating significantly reversed genes following AAV vector treatment. **f**, Spearman's correlation of the AAV/KO vs. KO/WT whole transcriptome. **g**, Heatmap of 26 most significantly reversed genes following AAV vector treatment. **h**, qPCR validation of six reversed genes normalized to housekeeping gene *B2m* and shown as fold-change relative to WT. Welch's 2-sided t-test was performed to compare WT vs. KO mice, and AAV vector-treated vs. untreated KO mice. Data: mean  $\pm$  SEM. \* $p < 0.05$ , \*\* $p < 0.01$ , \*\*\* $p < 0.001$  (n=4 mice per group). **i,j**, Enrichment plots on AAV vector-treated vs. untreated KO mice using disease signature gene sets consisting of the top 50% most significantly altered genes ( $p_{adj}<.05$ ,  $|\log_2FC|\geq 2$  in KO vs. WT RNA-seq), 243 of which were downregulated (**i**) and 39 upregulated (**j**) in KO vs. WT mice.

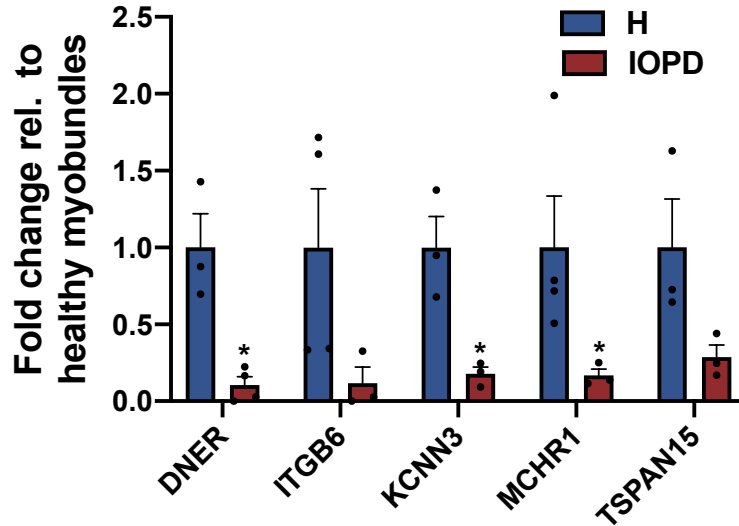

75  
 76 **Supplementary Figure 7. qPCR validation of RNA-seq results in myobundles.** Five genes  
 77 from the RNA-seq dataset with significant difference in expression between healthy and IOPD  
 78 myobundles validated using qPCR. The expression is normalized to housekeeping gene *B2M*  
 79 and shown as fold-change relative to healthy myobundles (n=3–4 donors per group). Data:  
 80 mean ± SEM. \*p < 0.05.

81  
 82

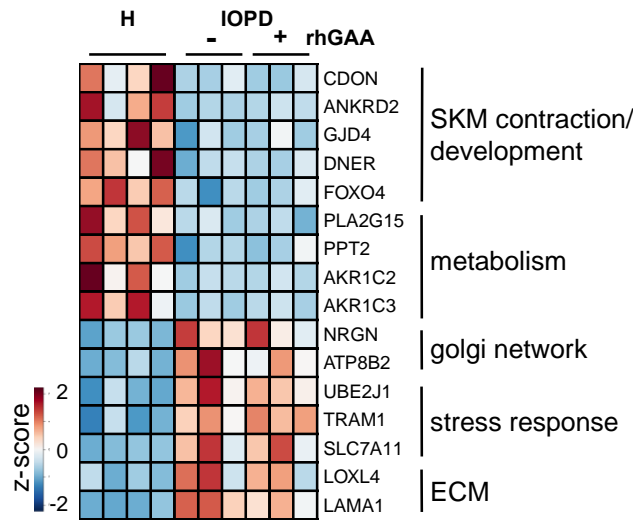

83  
 84 **Supplementary Figure 8. RNA-seq heatmap for healthy, IOPD, and rhGAA-treated**  
 85 **myobundles.** Heatmap of genes expressed in healthy, IOPD, and rhGAA-treated IOPD  
 86 myobundles, identified in healthy versus IOPD GO term enrichment analysis of RNA-seq data  
 87 with  $p_{adj} < .05$ . (n=3–4 donors per group).

88  
 89  
 90

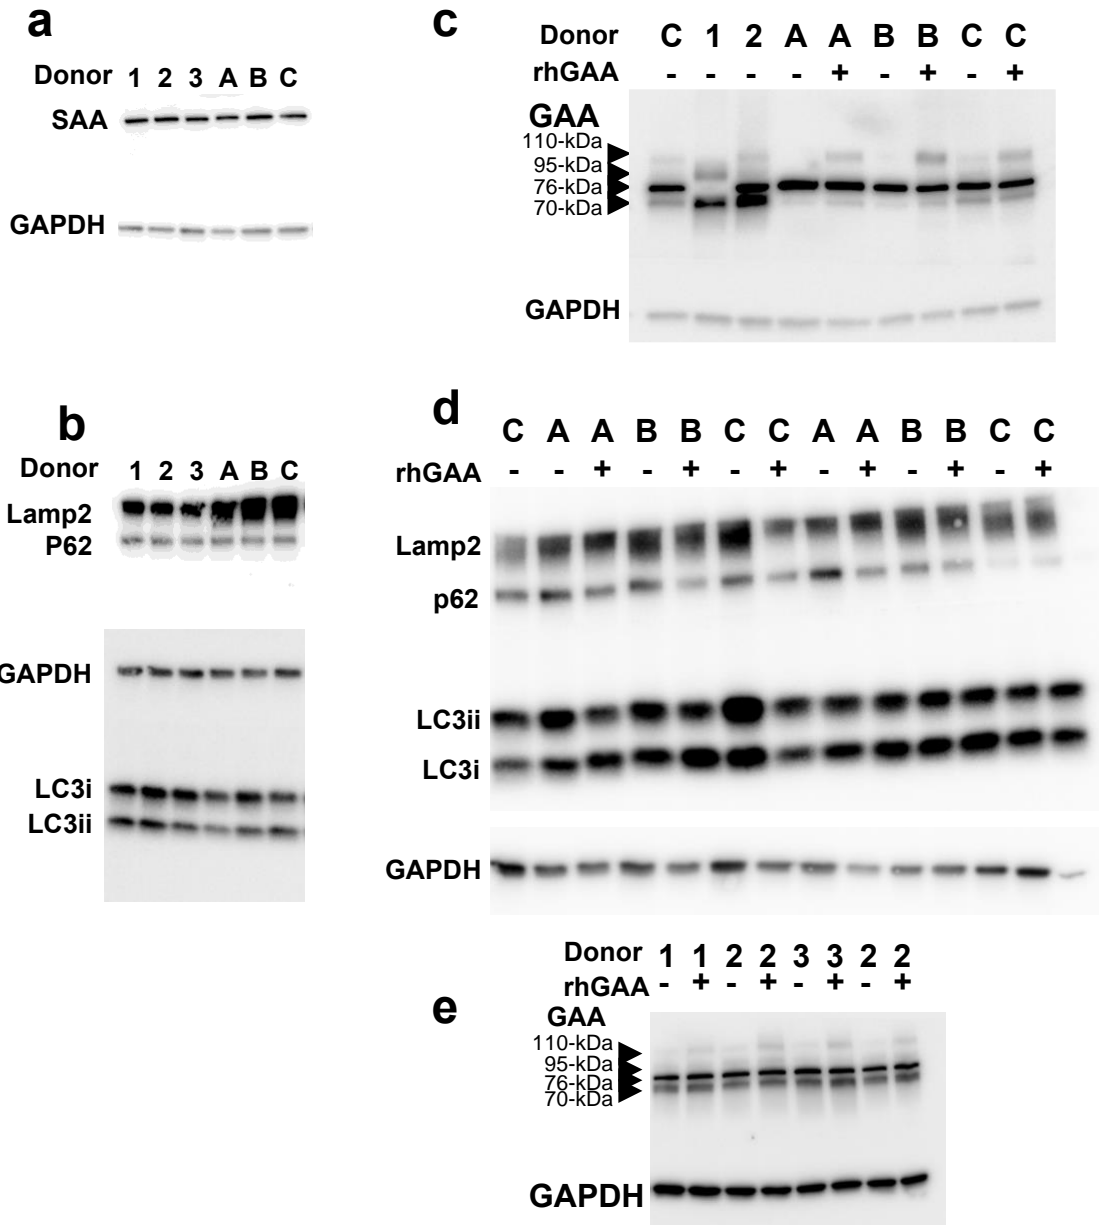

**Supplementary Figure 9. Original Western blots.** Western blots for healthy (1, 2, 3) and IOPD (A, B, C) myobundles with and without rhGAA treatment (+, -) **a**, Western blot for Figure 11. **b**, Western blot for Figure 2f for first stain (Lamp2, p62) and second stain (Gapdh, LC3i, LC3ii). **c**, Western blot for Figure 4b. **d**, Western blot for Figure 4f for first stain (Lamp2, p62, LC3ii, LC3i) and second stain (Gapdh). **e**, Western blot for Supp. Fig. 4.

91  
92  
93  
94  
95  
96  
97  
98  
99

100  
101  
102  
103  
104

| Antibody                            | Company             | Product No.      | Dilution              |
|-------------------------------------|---------------------|------------------|-----------------------|
| SAA                                 | Sigma               | A7811            | IF: 1:200, WB: 1:1000 |
| GAPDH                               | SCBT                | SC-47724         | WB: 1:1000            |
| DAPI                                | ThermoFisher        | 62247            | IF: 1:300             |
| Pax7                                | DSHB                | PAX7-b           | IF: 1:100             |
| Myogenin                            | SCBT                | sc-576           | IF: 1:100             |
| Myomesin                            | DSHB                | mMaC-myomesin-B4 | IF: 1:200             |
| Lamp2                               | SCBT                | sc-18822         | WB: 1:1000            |
| LC3                                 | Sigma               | L7543            | WB: 1:2000            |
| p62/SQSTM1                          | Cell Signaling Tech | 5536S            | WB: 1:1000 (BSA)      |
| GAA                                 | Abcam               | ab137068         | WB: 1:1000            |
| Lysotracker Red                     | ThermoFisher        | L7528            | IF: 1:20000           |
| Phalloidin 488                      | ThermoFisher        | A12379           | IF: 1:300             |
| GFP                                 | Abcam               | ab6556           | IF: 1:200             |
| chicken anti-Rabbit Alexa Fluor 594 | ThermoFisher        | a21442           | IF: 1:200             |
| chicken anti-Mouse Alexa Fluor 647  | ThermoFisher        | a21463           | IF: 1:200             |
| Goat anti-mouse IgG-HRP             | Sigma               | AP127P           | WB:1: 20000           |
| Goat anti-rabbit IgG-HRP            | SCBT                | SC-2030          | WB: 1:5000            |
| CD56 Pe-Cy7                         | BD biosciences      | 557747           | FC: 1:100             |
| CD29 APC                            | Thermofisher        | 17-0299-42       | FC: 1:100             |

105

106 **Supplementary Table 1. List of primary and secondary antibodies.** Order information and  
107 antibody dilutions for immunofluorescence (IF) and western blotting (WB).

108

109

110

111

112

113

114

115

116

117

118 mouse

| Gene   | Forward Primer           | Reverse Primer         |
|--------|--------------------------|------------------------|
| B2m    | TTCTGGTGCTTGTCTCACTGA    | CAGTATGTTCGGCTTCCCATTC |
| Adprh1 | GCCCTCGGCTATGGAAACATC    | CTCCCAGGTGAGAGCACAA    |
| Mustn1 | GTCTAAGACATAACCAGGTCATGC | GCGGCTGAATACAGATGGGG   |
| Nmrk2  | GACTTCTTCAAGCCCCAGGAC    | AGGAGGAGTACGTGGGTGTC   |
| Cacng7 | CGTCACCAAGTTGATCTCTGG    | AGACCACCGAGGTCAAGATG   |
| Pla2g7 | CTTTTCACTGGCAAGACACATCT  | CGACGGGGTACGATCCATTTC  |
| Snx10  | AGAGGAGTTCGTGAGTGTCTG    | CTTTGGAGTCTTTGCCTCAGC  |

119

120 human

| Gene    | Forward Primer        | Reverse Primer          |
|---------|-----------------------|-------------------------|
| B2M     | GAGGCTATCCAGCGTACTCCA | CGGCAGGCATACTCATCTTTT   |
| DNER    | CAGGGACCTCGTTAATGGCT  | CGCACTCTTCACCTGTAAACC   |
| ITGB6   | TCCATCTGGAGTTGGCGAAAG | TCTGTCTGCCTACACTGAGAG   |
| KCNN3   | GCTCCATCACCTAATGCCA   | TGGAGTCCTTTGAGTACAAACCC |
| MCHR1   | CTCACTTCGGCAGGATCACC  | TGAAGATGTCGGGGACGTTG    |
| TSPAN15 | AGTCCCGGAGAGAACGCC    | GCCCCAATCAGCCAGAACAC    |

121

122 **Supplementary Table 2. List of primers used for qRT-PCR.**

123
