# Supplementary material for: Three-dimensional tissue-engineered human skeletal muscle model of Pompe disease
Source: PubMed Central journal article supplement (PMC8100136; doi:10.1038/s42003-021-02059-4), 2021-05-05
Supplement: 42003_2021_2059_MOESM2_ESM.pdf [file 42003_2021_2059_MOESM2_ESM.pdf]

## **Description of Additional Supplementary Files**

**File Name:** Supplementary Data 1

**Description:** Contains disease signature identified by KO vs WT RNA-seq with human orthologs
